# Supplementary material for: Does the Age of Packed Red Blood Cells, Donor Sex or Sex Mismatch Affect the Sublingual Microcirculation in Critically Ill Intensive Care Unit Patients? — A Secondary Interpretation of a Retrospective Analysis
Source: Research Square preprint supplement (doi:10.21203/rs.3.rs-665862/v1), 2021-07-12
Supplement: Supplementary file 1 [file 52bf17ced269c9b00f392746.docx]

**Appendix**

**Appendix Table 1 Transfusion figures**

| **Characteristic** | **(*n* = 54)** | **(*n* = 43)** |
| --- | --- | --- |
| Blood type A, *n* (%) | 26 (48.1) |  |
| Blood type B, *n* (%) | 6 (11.1) |  |
| Blood type AB, *n* (%) | 2 (3.7) |  |
| Blood type 0, *n* (%) | 20 (37) |  |
| Rhesus positive, *n* (%) | 41 (75.9) |  |
| Age of pRBC at transfusion, (days; median and IQR) | 28.5 (19.3 – 36) |  |
| Donor sex, male, *n* (%) |  | 27 (62.8) |
| donor-recipient sex-match, *n* (%) |  | 17 (39.5) |
| donor-recipient sex-mismatch, *n* (%) |  | 26 (60.5) |

*IQR* interquartile range; *pRBC* packed red blood cells

**Appendix Table 2 Age of pRBC and effects on microcirculatory flow regarding sex and donor-recipient sex-mismatch**

|  | **All** | **Sex of donor** | | **Donor-recipient sex-mismatch** | |
| --- | --- | --- | --- | --- | --- |
|  |  | **Male** | **Female** | **Match** | **Mismatch** |
| *n* | 43 | 27 | 16 | 17 | 26 |
| Age of pRBC (days) | 28.0 (17 – 36.5) | 28.0 (16 – 36.5) | 27.5 (18.5 – 35.8) | 32.0 (25 – 37) | 26.0 (17 – 35.8) |
| ∆PPV (%) | 3.8 (-2 – 10.4) | 2.0 (-2.1 – 9.1) | 4.9 (-0.1 – 13.2) | 1.8 (-2.9 – 9.9) | 4.0 (-5 – 10.9) |
| ∆MFI (SD) | 0.15 (0.4) | 0.11 (0.4) | 0.23 (0.3) | 0.12 (0.4) | 0.17 (0.3) |

*∆* Difference between pre- and post-transfusion measurement; *PPV* proportion of perfused vessels; *MFI* microvascular flow I; *pRBC* packed red blood cells; *SD* standard deviation
